# Supplementary material
Source: PubMed Central journal article supplement (PMC3732996)

Type of file: figure

Label: Figure S1

Filename: Figure\_S1.pdf

Figure S1 related to Figure 3b

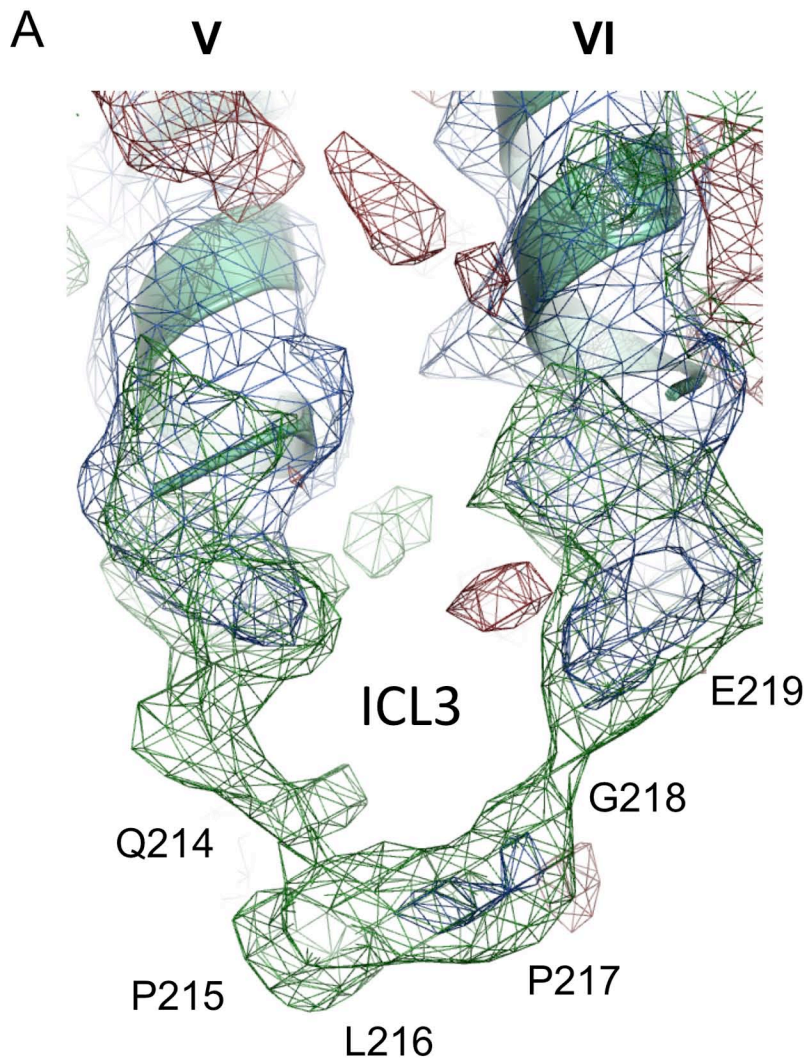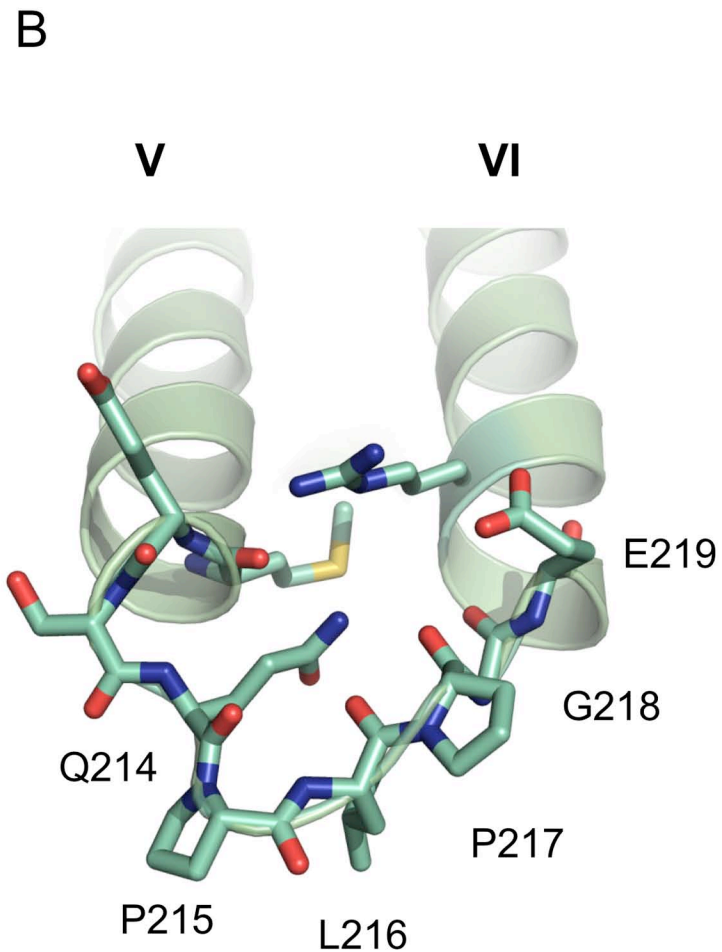

Type of file: figure

Label: Figure S2

Filename: Figure\_S2.pdf

Figure S2 related to Figure 1b

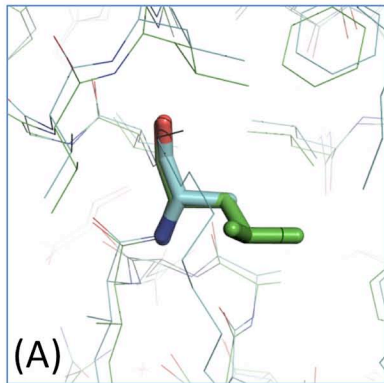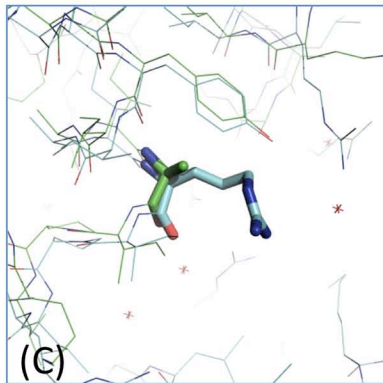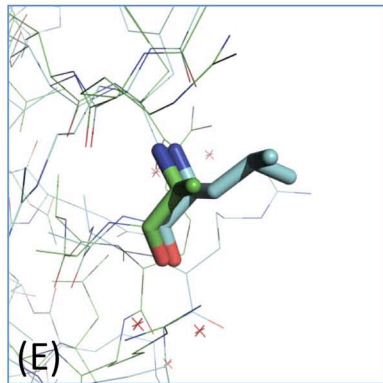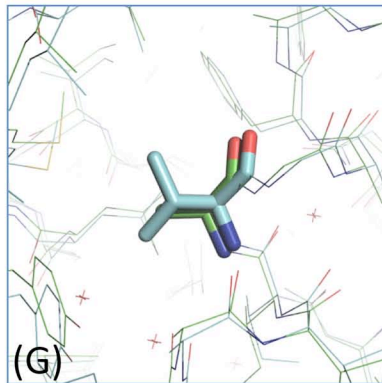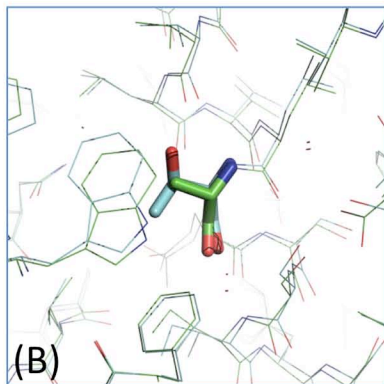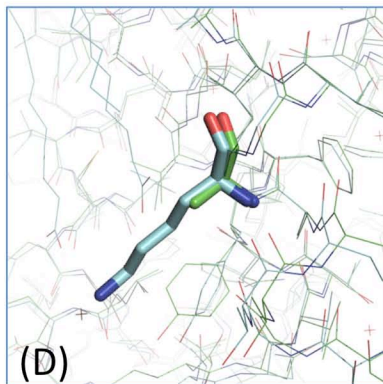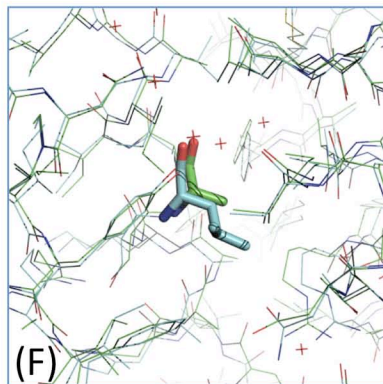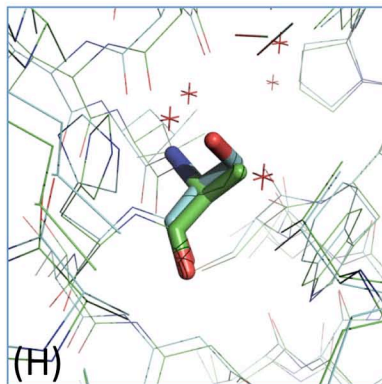

Type of file: figure

Label: Figure S3

Filename: Figure\_S3.pdf



Figure S3. A) related to Figure 4, and B) related to Figure 6A

A

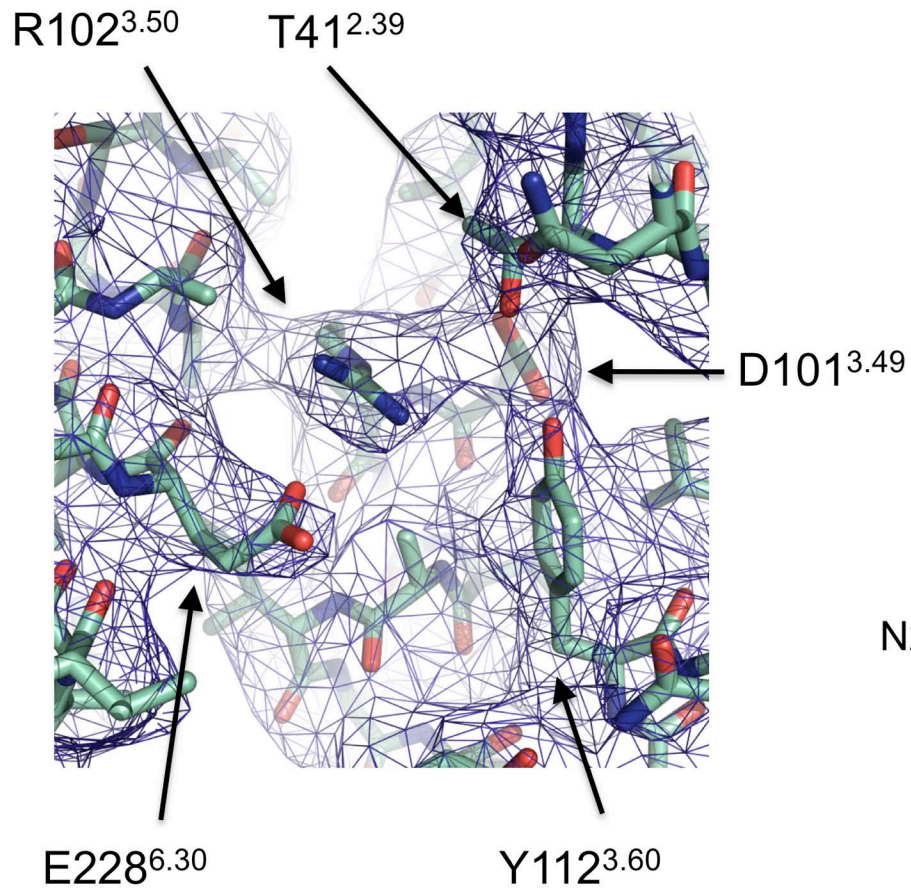

B

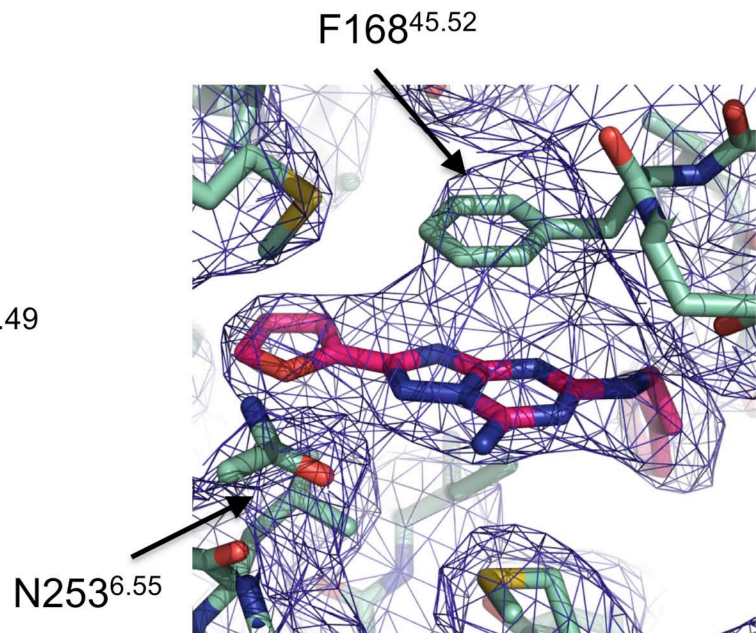

Type of file: figure

Label: Figure S4

Filename: Figure\_S4.pdf

Figure S4 related to Figure 6

A

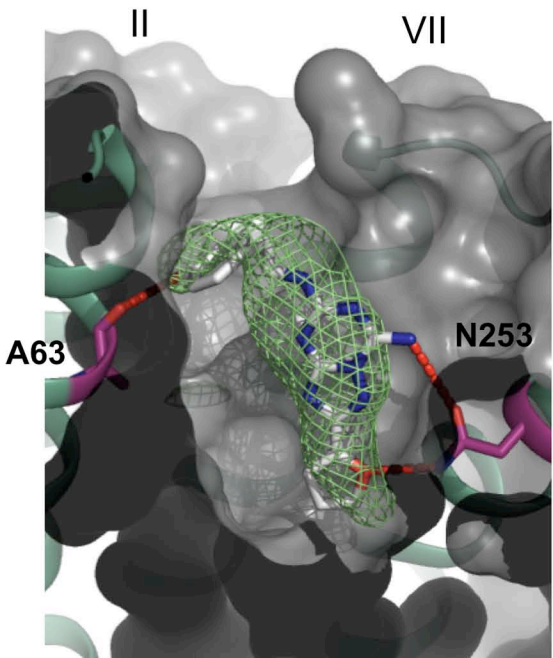

B

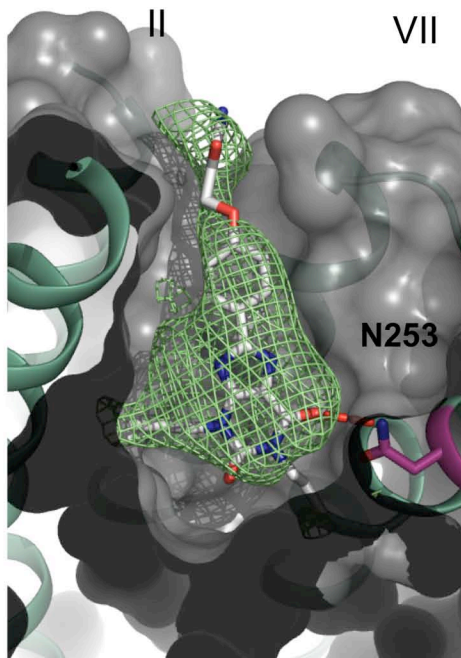

C

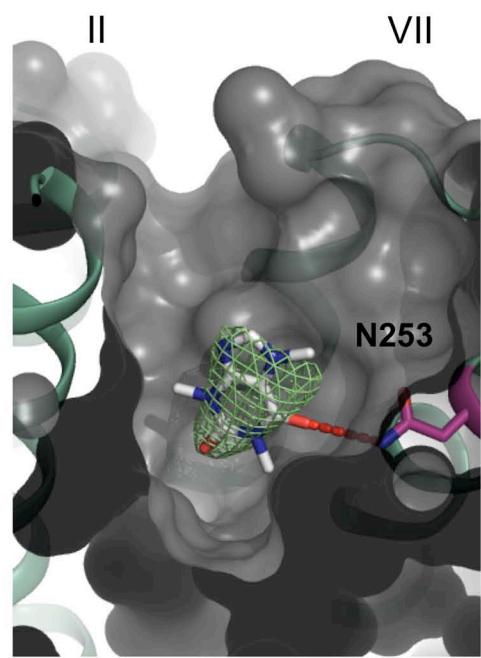

Supplement: NIHMS54017-supplement-02.pdf [file NIHMS54017-supplement-02.pdf]
